# Supplementary material for: CKD-Associated Pruritus and Clinical Outcomes in Nondialysis CKD
Source: PubMed Central journal article supplement — Kidney Med. 2023 Nov 28;6(1):100754. doi: 10.1016/j.xkme.2023.100754 (PMC10788264; doi:10.1016/j.xkme.2023.100754), 2023-11-28
Supplement: mmc1.pdf [file mmc1.pdf]

Suppl Table 1a. List of cause-specific death

| <b>Primary cause of death</b>                                                                                   |
|-----------------------------------------------------------------------------------------------------------------|
| <b><i>Cardiovascular-related</i></b>                                                                            |
| Myocardial infarction, acute                                                                                    |
| Pericarditis, incl. cardiac tamponade                                                                           |
| Atherosclerotic heart disease                                                                                   |
| Cardiomyopathy                                                                                                  |
| Cardiac arrhythmia                                                                                              |
| Cardiac arrest, cause unknown                                                                                   |
| Valvular heart disease                                                                                          |
| Pulmonary edema due to exogenous fluid                                                                          |
| Congestive heart failure                                                                                        |
| Stroke – hemorrhagic                                                                                            |
| Stroke – ischemic                                                                                               |
| <b><i>Infection-related</i></b>                                                                                 |
| Septicemia due to vascular access                                                                               |
| Septicemia due to peripheral vascular disease, gangrene                                                         |
| Septicemia, other                                                                                               |
| Infections, other                                                                                               |
| Cardiac infection (endocarditis)                                                                                |
| Pulmonary infection (pneumonia, influenza)                                                                      |
| Abdominal infection (peritonitis; not complication of PD), perforated bowel, diverticular disease, gallbladder) |
| Genitourinary infection (urinary tract infection, pyelonephritis, renal abscess)                                |

Suppl Table 1b. List of cause-specific hospitalization diagnosis/procedure

| <b>Cardiac/Cardiovascular</b>    |                                             |
|----------------------------------|---------------------------------------------|
| <i>Diagnosis</i>                 | <i>Procedures</i>                           |
| Hypertension                     | Cardiac catheterization                     |
| Angina                           | Coronary angioplasty                        |
| Chest pain, MI ruled out         | Coronary bypass graft (CABG)                |
| Acute myocardial infarction (MI) | Valve repair or replacement                 |
| Cardiac arrest/sudden death      | Cardioversion                               |
| Congestive heart failure         | AICD (defibrillator) placement              |
| Cardiomyopathy                   | Pacemaker placed                            |
| Valvular heart disease           | Pericardial procedure                       |
| Atrial fibrillation              | Other cardiac/cardiovascular                |
| Other arrhythmia                 | Carotid endarterectomy                      |
| Pericarditis &/or tamponade      | Evacuation of hematoma                      |
| Hypotension                      | Angiogram                                   |
| Other cardiac/cardiovascular     | Arterial bypass surgery                     |
| Transient ischemic attack (TIA)  | Aortic aneurysm repair                      |
| Subdural hematoma                | Wound debridement                           |
| Claudication/rest pain           | Other                                       |
| Ulcer of extremity               | Coronary angiogram                          |
| Gangrene                         | Percutaneous Transluminal Angioplasty (PTA) |
| Aortic aneurysm                  |                                             |
| Deep vein thrombosis             |                                             |
| Other vascular                   |                                             |
| Stroke - hemorrhagic             |                                             |
| Stroke - ischemic                |                                             |
| Tachycardia                      |                                             |
| Unstable angina                  |                                             |
| <b>Infectious Diseases</b>       |                                             |
| <i>Diagnosis</i>                 | <i>Procedures</i>                           |
| Gastroenteritis                  | Abscess drainage                            |
| Pneumonia                        | Antibiotic therapy                          |
| Septicemia                       | Other                                       |
| Endocarditis                     |                                             |
| AIDS/HIV                         |                                             |
| Urinary tract infection          |                                             |
| Wound infection                  |                                             |
| Abscess                          |                                             |
| Meningitis                       |                                             |
| Cellulitis/soft tissue infection |                                             |
| Osteomyelitis                    |                                             |
| Viral infection                  |                                             |
| Fungal infection                 |                                             |
| Fever or chills, source unknown  |                                             |
| Other infectious diseases        |                                             |
| Bronchitis                       |                                             |

|                           |  |
|---------------------------|--|
| Pneumonia                 |  |
| Cellulitis/skin infection |  |
